# Supplementary material
Source: PubMed Central journal article supplement (PMC3628297)
Supplement: NIHMS438024-supplement-01.pdf [file NIHMS438024-supplement-01.pdf]

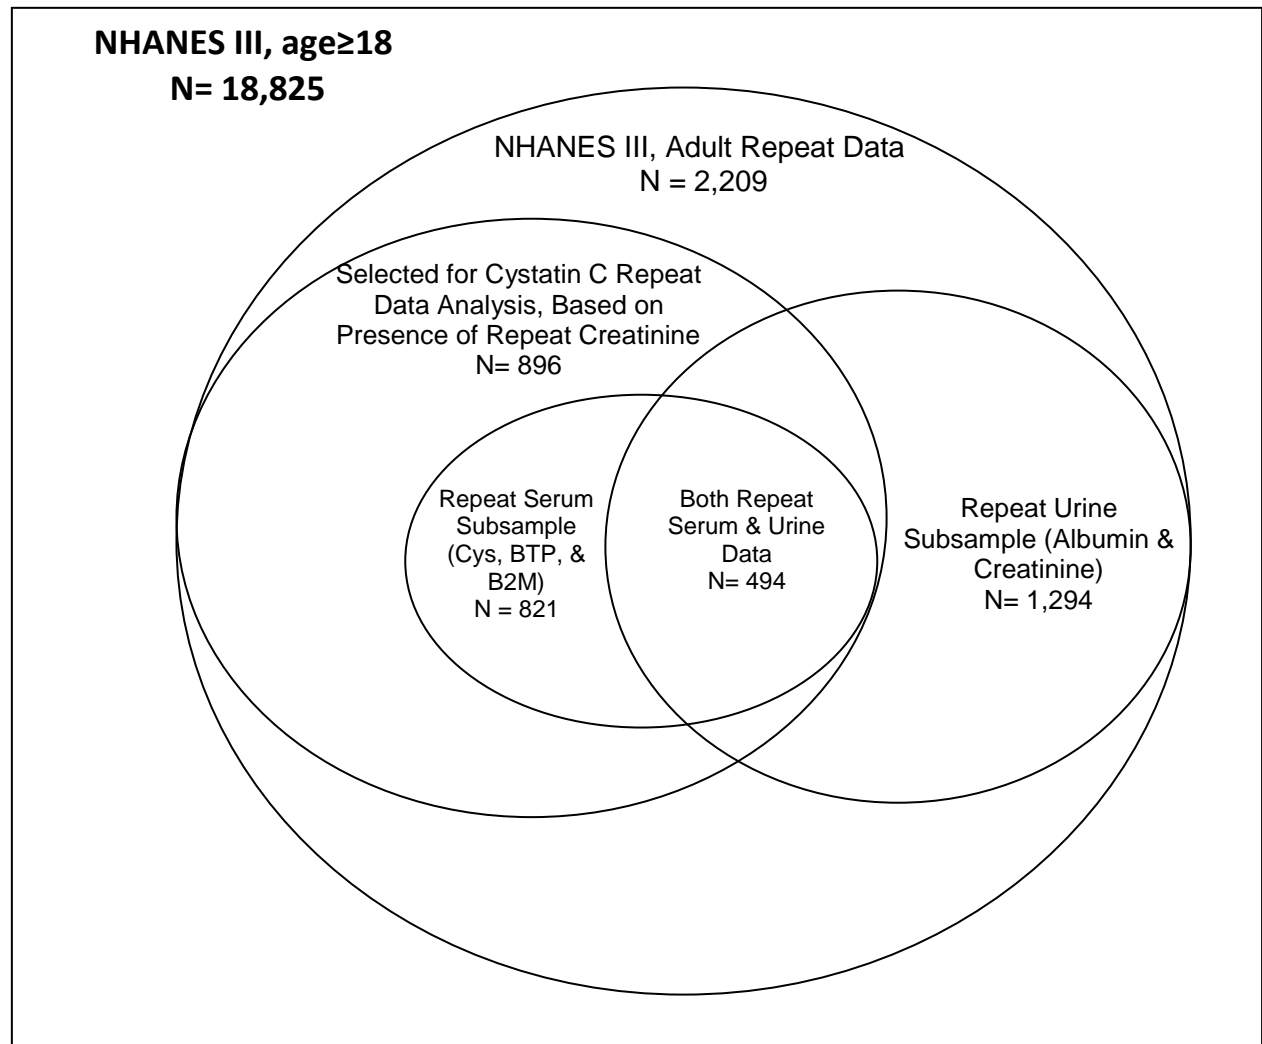

Figure S1. Venn diagram showing selection of repeat serum markers and repeat urine markers study samples from the larger NHANES III and NHANES III Second Examination study populations
